# Supplementary material for: Long-term Absolute Risk for Cardiovascular Disease Stratified by Fasting Glucose Level
Source: Oxford University Press journal article supplement (doi:10.2337/dc18-1773), 2019-01-07
Supplement: dc181773supplementarydata.pdf [file dc181773supplementarydata.pdf]

## SUPPLEMENTARY DATA

### **Long-term absolute risk for cardiovascular disease stratified by fasting glucose level**

#### **Short-title: Blood glucose and absolute cardiovascular risk**

Michael P. Bancks, PhD<sup>1,2</sup>, Hongyan Ning, MD<sup>2</sup>, Norrina B. Allen, PhD<sup>2</sup>, Alain G. Bertoni, MD<sup>1</sup>, Mercedes R. Carnethon, PhD<sup>2</sup>, Adolfo Correa, MD<sup>3</sup>, Justin B. Echouffo Tcheugui, MD<sup>4</sup>, Leslie A. Lange, PhD<sup>5</sup>, Donald M. Lloyd-Jones, MD<sup>2</sup>, John T. Wilkins, MD<sup>2</sup>

<sup>1</sup>Wake Forest University School of Medicine, Winston-Salem, NC

<sup>2</sup>Northwestern University, Chicago, IL

<sup>3</sup>University of Mississippi Medical Center, Jackson, MS

<sup>4</sup>Johns Hopkins University, Baltimore, MD

<sup>5</sup>University of Colorado Denver, Anschutz Medical Campus, Aurora, CO

**Corresponding author:** Mike Bancks, Wake Forest University School of Medicine, Department of Epidemiology & Prevention, 525 Vine Street, 5th Floor, Winston-Salem, NC, 27101. E-mail: [mbancks@wakehealth.edu](mailto:mbancks@wakehealth.edu), Telephone: +1-336-716-9736

SUPPLEMENTARY DATA

**Supplementary Table 1.** Incidence rates and 95% confidence intervals for atherosclerotic cardiovascular disease including fatal and non-fatal coronary heart disease and stroke according to fasting glucose category for index ages 45, 55, 65, and 75 years

|                                             | Incidence per 1000 Person Years (PY) and 95% Confidence Intervals |               |                   |             |                   |             |                  |
|---------------------------------------------|-------------------------------------------------------------------|---------------|-------------------|-------------|-------------------|-------------|------------------|
| Index Age 45                                |                                                                   | ASCVD         |                   | CHD         |                   | Stroke      |                  |
| Fasting Glucose (FG) Category               | N                                                                 | Events/PY     | Incidence (95%)   | Events/PY   | Incidence (95%)   | Events/PY   | Incidence (95%)  |
| FG <5.0 mmol/L                              | 4829                                                              | 214 / 71180.5 | 3.0 (2.6, 3.4)    | 146 / 71602 | 2.0 (1.7, 2.4)    | 154 / 63914 | 2.4 (2, 2.8)     |
| FG 5.0-5.5 mmol/L                           | 3952                                                              | 222 / 61460   | 3.6 (3.1, 4.1)    | 156 / 61742 | 2.5 (2.1, 2.9)    | 220 / 98517 | 2.2 (1.9, 2.5)   |
| FG 5.6-6.2 mmol/L                           | 1859                                                              | 165 / 29898   | 5.5 (4.7, 6.4)    | 119 / 30194 | 3.9 (3.2, 4.6)    | 209 / 74807 | 2.8 (2.4, 3.2)   |
| FG 6.3-6.9 mmol/L                           | 369                                                               | 46 / 5792.5   | 7.9 (5.6, 10.2)   | 29 / 5895   | 4.9 (3.1, 6.7)    | 70 / 18480  | 3.8 (2.9, 4.7)   |
| FG ≥7.0 mmol/L or diabetes medications (Rx) | 611                                                               | 123 / 7945    | 15.5 (12.7, 18.2) | 87 / 8128   | 10.7 (8.5, 13)    | 224 / 23888 | 9.4 (8.1, 10.6)  |
| Index Age 55                                |                                                                   | ASCVD         |                   | CHD         |                   | Stroke      |                  |
| Fasting Glucose (FG) Category               | N                                                                 | Events/PY     | Incidence (95%)   | Events/PY   | Incidence (95%)   | Events/PY   | Incidence (95%)  |
| FG <5.0 mmol/L                              | 4798                                                              | 385 / 62625.5 | 6.1 (5.5, 6.8)    | 263 / 63258 | 4.2 (3.7, 4.7)    | 154 / 63914 | 2.4 (2, 2.8)     |
| FG 5.0-5.5 mmol/L                           | 6772                                                              | 584 / 96479   | 6.1 (5.6, 6.5)    | 397 / 97495 | 4.1 (3.7, 4.5)    | 220 / 98517 | 2.2 (1.9, 2.5)   |
| FG 5.6-6.2 mmol/L                           | 4883                                                              | 559 / 72711   | 7.7 (7.1, 8.3)    | 396 / 73500 | 5.4 (4.9, 5.9)    | 209 / 74807 | 2.8 (2.4, 3.2)   |
| FG 6.3-6.9 mmol/L                           | 1234                                                              | 192 / 17831   | 10.8 (9.2, 12.3)  | 135 / 18188 | 7.4 (6.2, 8.7)    | 70 / 18480  | 3.8 (2.9, 4.7)   |
| FG ≥7.0 mmol/L or diabetes medications (Rx) | 1943                                                              | 497 / 22477   | 22.1 (20.2, 24.1) | 339 / 23329 | 14.5 (13, 16.1)   | 224 / 23888 | 9.4 (8.1, 10.6)  |
| Index Age 65                                |                                                                   | ASCVD         |                   | CHD         |                   | Stroke      |                  |
| Fasting Glucose (FG) Category               | N                                                                 | Events/PY     | Incidence (95%)   | Events/PY   | Incidence (95%)   | Events/PY   | Incidence (95%)  |
| FG <5.0 mmol/L                              | 3020                                                              | 403 / 37675.5 | 10.7 (9.7, 11.7)  | 244 / 38439 | 6.3 (5.6, 7.1)    | 195 / 38606 | 5.1 (4.3, 5.8)   |
| FG 5.0-5.5 mmol/L                           | 5199                                                              | 820 / 69299.5 | 11.8 (11, 12.6)   | 524 / 70576 | 7.4 (6.8, 8.1)    | 358 / 71253 | 5.0 (4.5, 5.5)   |
| FG 5.6-6.2 mmol/L                           | 4327                                                              | 828 / 58421.5 | 14.2 (13.2, 15.1) | 577 / 59620 | 9.7 (8.9, 10.5)   | 322 / 60618 | 5.3 (4.7, 5.9)   |
| FG 6.3-6.9 mmol/L                           | 1252                                                              | 255 / 16359.5 | 15.6 (13.7, 17.5) | 166 / 16803 | 9.9 (8.4, 11.4)   | 105 / 16956 | 6.2 (5, 7.4)     |
| FG ≥7.0 mmol/L or diabetes medications (Rx) | 2237                                                              | 670 / 24212.5 | 27.7 (25.6, 29.8) | 480 / 25232 | 19.0 (17.3, 20.7) | 265 / 25584 | 10.4 (9.1, 11.6) |
| Index Age 75                                |                                                                   | ASCVD         |                   | CHD         |                   | Stroke      |                  |
| Fasting Glucose (FG) Category               | N                                                                 | Events/PY     | Incidence (95%)   | Events/PY   | Incidence (95%)   | Events/PY   | Incidence (95%)  |
| FG <5.0 mmol/L                              | 1833                                                              | 383 / 19586   | 19.6 (17.6, 21.5) | 236 / 20086 | 11.7 (10.3, 13.2) | 181 / 20120 | 9.0 (7.7, 10.3)  |
| FG 5.0-5.5 mmol/L                           | 2861                                                              | 706 / 31536   | 22.4 (20.7, 24)   | 454 / 32483 | 14.0 (12.7, 15.3) | 337 / 32579 | 10.3 (9.2, 11.4) |
| FG 5.6-6.2 mmol/L                           | 2102                                                              | 582 / 22398   | 26 (23.9, 28.1)   | 394 / 23165 | 17.0 (15.3, 18.7) | 256 / 23476 | 10.9 (9.6, 12.2) |
| FG 6.3-6.9 mmol/L                           | 635                                                               | 197 / 6515    | 30.2 (26, 34.5)   | 125 / 6805  | 18.4 (15.1, 21.6) | 90 / 6797   | 13.2 (10.5, 16)  |
| FG ≥7.0 mmol/L or diabetes medications (Rx) | 1238                                                              | 407 / 11227.5 | 36.3 (32.7, 39.8) | 287 / 11716 | 24.5 (21.7, 27.3) | 185 / 11738 | 15.8 (13.5, 18)  |

SUPPLEMENTARY DATA

**Supplementary Table 2.** Long-term risk for incident atherosclerotic cardiovascular disease (including fatal and non-fatal coronary heart disease and stroke) according to fasting glucose category at index age 55 when not accounting for the competing risk of non-atherosclerotic cardiovascular disease death

|                                             | <b>30-Year Risk for Incident Atherosclerotic Cardiovascular Disease, Probability (95% CI)</b> |        |                     |                   |             |        |                     |                   |
|---------------------------------------------|-----------------------------------------------------------------------------------------------|--------|---------------------|-------------------|-------------|--------|---------------------|-------------------|
| Women                                       | White Women                                                                                   |        |                     |                   | Black Women |        |                     |                   |
| Fasting Glucose (FG) Category               | N                                                                                             | Events | Absolute Risk (95%) | RR* (95%)         | N           | Events | Absolute Risk (95%) | RR* (95%)         |
| FG <5.0 mmol/L                              | 2231                                                                                          | 152    | 16.2 (12.5, 19.9)   | Reference         | 1083        | 53     | 19.0 (8.1, 29.9)    | Reference         |
| FG 5.0-5.5 mmol/L                           | 2744                                                                                          | 183    | 16.6 (13.4, 19.9)   | 0.98 (0.80, 1.20) | 1072        | 64     | 18.8 (12.9, 24.8)   | 1.22 (0.86, 1.74) |
| FG 5.6-6.2 mmol/L                           | 1540                                                                                          | 132    | 16.5 (13.1, 19.9)   | 1.26 (1.01, 1.57) | 773         | 69     | 20.2 (14.0, 26.3)   | 1.82 (1.29, 2.58) |
| FG 6.3-6.9 mmol/L                           | 307                                                                                           | 32     | 19.7 (12.6, 26.8)   | 1.53 (1.07, 2.20) | 221         | 22     | 27.2 (9.0, 45.3)    | 2.03 (1.26, 3.27) |
| FG ≥7.0 mmol/L or diabetes medications (Rx) | 421                                                                                           | 107    | 43.9 (36.6, 51.2)   | 3.73 (2.98, 4.67) | 623         | 123    | 43.8 (34.4, 53.3)   | 4.03 (2.97, 5.48) |
|                                             |                                                                                               |        |                     |                   |             |        |                     |                   |
| Men                                         | White Men                                                                                     |        |                     |                   | Black Men   |        |                     |                   |
| Fasting Glucose (FG) Category               | N                                                                                             | Events | Absolute Risk (95%) | RR* (95%)         | N           | Events | Absolute Risk (95%) | RR* (95%)         |
| FG <5.0 mmol/L                              | 974                                                                                           | 140    | 26.1 (21.3, 30.9)   | Reference         | 510         | 40     | 27.6 (15.7, 39.5)   | Reference         |
| FG 5.0-5.5 mmol/L                           | 2188                                                                                          | 259    | 22.5 (19.4, 25.6)   | 1.74 (1.43, 2.10) | 768         | 78     | 35.1 (23.9, 46.4)   | 2.08 (1.48, 2.91) |
| FG 5.6-6.2 mmol/L                           | 1993                                                                                          | 288    | 26.1 (22.5, 29.8)   | 2.12 (1.76, 2.56) | 577         | 70     | 25.2 (18.0, 32.4)   | 2.48 (1.76, 3.49) |
| FG 6.3-6.9 mmol/L                           | 522                                                                                           | 105    | 33.7 (26.2, 41.2)   | 2.95 (2.35, 3.71) | 184         | 33     | 41.5 (27.0, 55.9)   | 3.66 (2.44, 5.50) |
| FG ≥7.0 mmol/L or diabetes medications (Rx) | 513                                                                                           | 169    | 53.5 (46.4, 60.7)   | 4.84 (3.97, 5.89) | 386         | 98     | 67.6 (50.6, 84.6)   | 5.19 (3.79, 7.10) |

\*RR: relative risk (95% confidence interval)

†Absolute risk estimates can account for competing risk of death but cannot adjust for covariates

SUPPLEMENTARY DATA

**Supplementary Table 3.** Long-term risk for incident atherosclerotic cardiovascular disease (including fatal and non-fatal coronary heart disease and stroke, and adjusted for competing risk of death) according to fasting glucose category starting at index age 45

|                                                            |      | <b>30-Year Risk for Atherosclerotic Cardiovascular Disease, Probability (95% CI)</b> |                     |                    |        |                     |                    |        |                     |                    |
|------------------------------------------------------------|------|--------------------------------------------------------------------------------------|---------------------|--------------------|--------|---------------------|--------------------|--------|---------------------|--------------------|
| Women                                                      |      | ASCVD                                                                                |                     |                    | CHD    |                     |                    | Stroke |                     |                    |
| Fasting Glucose (FG) Category                              | N    | Events                                                                               | Absolute Risk (95%) | RR* (95%)          | Events | Absolute Risk (95%) | RR* (95%)          | Events | Absolute Risk (95%) | RR* (95%)          |
| FG <5.0 mmol/L                                             | 3193 | 99                                                                                   | 5.6 (4.2, 7.0)      | Reference          | 49     | 3.2 (2.1, 4.3)      | Reference          | 55     | 2.8 (1.9, 3.8)      | Reference          |
| FG 5.0-5.5 mmol/L                                          | 2123 | 77                                                                                   | 6.1 (4.7, 7.6)      | 1.17 (0.90, 1.53)  | 45     | 3.5 (2.4, 4.6)      | 1.38 (0.92, 2.06)  | 36     | 3.1 (2.0, 4.3)      | 0.98 (0.65, 1.49)  |
| FG 5.6-6.2 mmol/L                                          | 826  | 46                                                                                   | 8.3 (5.7, 10.9)     | 1.80 (1.30, 2.47)  | 29     | 4.9 (2.9, 6.9)      | 2.29 (1.45, 3.60)  | 22     | 4.0 (2.1, 5.9)      | 1.55 (0.95, 2.52)  |
| FG 6.3-6.9 mmol/L                                          | 164  | 16                                                                                   | 14.1 (7.5, 20.6)    | 3.15 (1.93, 5.14)  | 9      | 8.1 (2.9, 13.3)     | 3.58 (1.79, 7.15)  | 10     | 8.7 (3.5, 14.0)     | 3.54 (1.84, 6.82)  |
| FG ≥7.0 mmol/L or diabetes medications (Rx)                | 328  | 62                                                                                   | 31.1 (23.9, 38.3)   | 6.10 (4.65, 8.00)  | 39     | 18.7 (13.0, 24.4)   | 7.75 (5.17, 11.62) | 31     | 17.0 (10.7, 23.3)   | 5.49 (3.59, 8.39)  |
| Men                                                        |      | ASCVD                                                                                |                     |                    | CHD    |                     |                    | Stroke |                     |                    |
| Fasting Glucose (FG) Category                              | N    | Events                                                                               | Absolute Risk (95%) | RR* (95%)          | Events | Absolute Risk (95%) | RR* (95%)          | Events | Absolute Risk (95%) | RR* (95%)          |
| FG <5.0 mmol/L                                             | 1636 | 115                                                                                  | 14.8 (11.1, 18.4)   | Reference          | 97     | 12.3 (8.9, 15.8)    | Reference          | 31     | 3.9 (2.0, 5.7)      | Reference          |
| FG 5.0-5.5 mmol/L                                          | 1829 | 145                                                                                  | 13.4 (11.0, 15.8)   | 1.13 (0.89, 1.43)  | 111    | 9.5 (7.7, 11.4)     | 1.02 (0.79, 1.33)  | 46     | 5.2 (3.4, 7.0)      | 1.33 (0.85, 2.08)  |
| FG 5.6-6.2 mmol/L                                          | 1033 | 119                                                                                  | 17.7 (14.4, 21.0)   | 1.64 (1.28, 2.09)  | 90     | 13.6 (10.6, 16.7)   | 1.47 (1.11, 1.94)  | 34     | 4.8 (3.2, 6.4)      | 1.74 (1.07, 2.81)  |
| FG 6.3-6.9 mmol/L                                          | 205  | 30                                                                                   | 23.1 (14.5, 31.7)   | 2.08 (1.43, 3.03)  | 20     | 12.9 (7.4, 18.3)    | 1.65 (1.04, 2.60)  | 12     | 11.6 (3.9, 19.3)    | 3.09 (1.61, 5.92)  |
| FG ≥7.0 mmol/L or diabetes medications (Rx)                | 283  | 61                                                                                   | 33.3 (26.1, 40.5)   | 3.07 (2.31, 4.07)  | 48     | 26.8 (19.9, 33.6)   | 2.86 (2.07, 3.95)  | 20     | 12.0 (6.8, 17.2)    | 3.73 (2.16, 6.45)  |
| Subsample with concurrent FG and HbA1c                     |      | <b>20-Year Risk for Atherosclerotic Cardiovascular Disease, Probability (95% CI)</b> |                     |                    |        |                     |                    |        |                     |                    |
| Women                                                      |      | ASCVD                                                                                |                     |                    | CHD    |                     |                    | Stroke |                     |                    |
| FG and HbA1c Category                                      | N    | Events                                                                               | Absolute Risk (95%) | RR* (95%)          | Events | Absolute Risk (95%) | RR* (95%)          | Events | Absolute Risk (95%) | RR* (95%)          |
| FG <5.6 mmol/L and HbA1c <5.7% (<39 mmol/mol)              | 1873 | 21                                                                                   | 1.8 (1.0, 2.6)      | Reference          | 11     | 0.9 (0.3, 1.4)      | Reference          | 12     | 1.0 (0.4, 1.7)      | Reference          |
| FG 5.6-6.9 mmol/L or HbA1c 5.7-6.4% (39-47 mmol/mol)       | 757  | 13                                                                                   | 5.0 (0.2, 9.8)      | 1.53 (0.77, 3.04)  | 5      | 1.4 (0.0, 2.9)      | 1.12 (0.39, 3.23)  | 8      | 3.6 (0.0, 8.2)      | 1.65 (0.68, 4.02)  |
| FG ≥7.0 mmol/L, HbA1c ≥6.5% (≥48 mmol/mol), or diabetes Rx | 211  | 18                                                                                   | 13.2 (6.6, 19.8)    | 7.61 (4.12, 14.05) | 10     | 7.8 (2.2, 13.3)     | 8.07 (3.47, 18.78) | 9      | 5.9 (2.1, 9.7)      | 6.66 (2.84, 15.62) |

## SUPPLEMENTARY DATA

| Men                                                        |      | ASCVD  |                     |                   | CHD    |                     |                   | Stroke |                     |                    |
|------------------------------------------------------------|------|--------|---------------------|-------------------|--------|---------------------|-------------------|--------|---------------------|--------------------|
| FG and HbA1c Category                                      | N    | Events | Absolute Risk (95%) | RR* (95%)         | Events | Absolute Risk (95%) | RR* (95%)         | Events | Absolute Risk (95%) | RR* (95%)          |
| FG <5.6 mmol/L and HbA1c <5.7% (<39 mmol/mol)              | 1119 | 37     | 5.8 (3.5, 8.0)      | Reference         | 27     | 4.0 (2.4, 5.7)      | Reference         | 11     | 1.9 (0.3, 3.5)      | Reference          |
| FG 5.6-6.9 mmol/L or HbA1c 5.7-6.4% (39-47 mmol/mol)       | 837  | 31     | 7.4 (4.1, 10.7)     | 1.12 (0.70, 1.79) | 24     | 5.9 (2.8, 9.0)      | 1.19 (0.69, 2.04) | 11     | 2.3 (0.9, 3.8)      | 1.34 (0.58, 3.07)  |
| FG ≥7.0 mmol/L, HbA1c ≥6.5% (≥48 mmol/mol), or diabetes Rx | 176  | 12     | 13.5 (5.9, 21.1)    | 2.06 (1.10, 3.88) | 6      | 7.7 (1.4, 13.9)     | 1.41 (0.59, 3.37) | 7      | 7.5 (1.8, 13.2)     | 4.05 (1.59, 10.30) |

\*RR: relative risk (95% confidence interval)

†Absolute risk estimates can account for competing risk of death but cannot adjust for covariates

SUPPLEMENTARY DATA

**Supplementary Table 4.** Long-term risk for incident atherosclerotic cardiovascular disease (including fatal and non-fatal coronary heart disease and stroke, and adjusted for competing risk of death) according to fasting glucose category starting at index age 65

|                                                      |      | <b>30-Year Risk for Atherosclerotic Cardiovascular Disease, Probability (95% CI)</b> |                     |                   |        |                     |                   |        |                     |                   |
|------------------------------------------------------|------|--------------------------------------------------------------------------------------|---------------------|-------------------|--------|---------------------|-------------------|--------|---------------------|-------------------|
| Women                                                |      | ASCVD                                                                                |                     |                   | CHD    |                     |                   | Stroke |                     |                   |
| Fasting Glucose (FG) Category                        | N    | Events                                                                               | Absolute Risk (95%) | RR* (95%)         | Events | Absolute Risk (95%) | RR* (95%)         | Events | Absolute Risk (95%) | RR* (95%)         |
| FG <5.0 mmol/L                                       | 2002 | 234                                                                                  | 29.8 (25.1, 34.4)   | Reference         | 139    | 17.6 (13.9, 21.2)   | Reference         | 117    | 14.7 (11.2, 18.1)   | Reference         |
| FG 5.0-5.5 mmol/L                                    | 2941 | 391                                                                                  | 32.2 (28.4, 35.9)   | 1.14 (0.98, 1.32) | 216    | 17.2 (14.3, 20.1)   | 1.06 (0.86, 1.30) | 198    | 16.9 (13.9, 19.8)   | 1.15 (0.92, 1.44) |
| FG 5.6-6.2 mmol/L                                    | 2099 | 351                                                                                  | 30.3 (26.9, 33.8)   | 1.43 (1.23, 1.67) | 223    | 20.0 (16.9, 23.0)   | 1.53 (1.25, 1.87) | 159    | 13.6 (11.2, 16.0)   | 1.30 (1.03, 1.63) |
| FG 6.3-6.9 mmol/L                                    | 603  | 108                                                                                  | 31.0 (24.8, 37.2)   | 1.53 (1.24, 1.89) | 65     | 19.6 (14.1, 25.1)   | 1.55 (1.17, 2.05) | 49     | 13.0 (9.2, 16.8)    | 1.39 (1.01, 1.92) |
| FG ≥7.0 mmol/L or diabetes medications (Rx)          | 1176 | 302                                                                                  | 43.4 (38.1, 48.7)   | 2.20 (1.88, 2.56) | 211    | 31.6 (26.7, 36.6)   | 2.58 (2.11, 3.16) | 132    | 18.0 (14.8, 21.1)   | 1.92 (1.51, 2.44) |
| Men                                                  |      | ASCVD                                                                                |                     |                   | CHD    |                     |                   | Stroke |                     |                   |
| Fasting Glucose (FG) Category                        | N    | Events                                                                               | Absolute Risk (95%) | RR* (95%)         | Events | Absolute Risk (95%) | RR* (95%)         | Events | Absolute Risk (95%) | RR* (95%)         |
| FG <5.0 mmol/L                                       | 1018 | 169                                                                                  | 30.2 (24.7, 35.8)   | Reference         | 105    | 19.6 (14.8, 24.5)   | Reference         | 78     | 13.8 (10.0, 17.5)   | Reference         |
| FG 5.0-5.5 mmol/L                                    | 2258 | 429                                                                                  | 32.8 (29.2, 36.5)   | 1.14 (0.97, 1.35) | 308    | 23.6 (20.3, 26.8)   | 1.32 (1.07, 1.63) | 160    | 12.5 (10.1, 14.9)   | 0.92 (0.71, 1.20) |
| FG 5.6-6.2 mmol/L                                    | 2228 | 477                                                                                  | 36.1 (32.4, 39.9)   | 1.29 (1.10, 1.51) | 354    | 29.5 (25.7, 33.2)   | 1.54 (1.26, 1.89) | 163    | 11.0 (9.1, 12.8)    | 0.95 (0.74, 1.24) |
| FG 6.3-6.9 mmol/L                                    | 649  | 147                                                                                  | 36.9 (30.2, 43.6)   | 1.36 (1.12, 1.66) | 101    | 27.7 (21.1, 34.4)   | 1.51 (1.17, 1.95) | 56     | 12.5 (9.0, 16.0)    | 1.13 (0.81, 1.56) |
| FG ≥7.0 mmol/L or diabetes medications (Rx)          | 1061 | 368                                                                                  | 52.0 (46.7, 57.2)   | 2.09 (1.78, 2.45) | 269    | 39.5 (34.4, 44.6)   | 2.46 (2.00, 3.03) | 133    | 18.8 (15.2, 22.5)   | 1.64 (1.25, 2.13) |
| Subsample with concurrent FG and HbA1c               |      | <b>20-Year Risk for Atherosclerotic Cardiovascular Disease, Probability (95% CI)</b> |                     |                   |        |                     |                   |        |                     |                   |
| Women                                                |      | ASCVD                                                                                |                     |                   | CHD    |                     |                   | Stroke |                     |                   |
| FG and HbA1c Category                                | N    | Events                                                                               | Absolute Risk (95%) | RR* (95%)         | Events | Absolute Risk (95%) | RR* (95%)         | Events | Absolute Risk (95%) | RR* (95%)         |
| FG <5.6 mmol/L and HbA1c <5.7% (<39 mmol/mol)        | 453  | 28                                                                                   | 12.5 (7.5, 17.5)    | Reference         | 18     | 8.8 (4.3, 13.3)     | Reference         | 13     | 5.3 (1.9, 8.7)      | Reference         |
| FG 5.6-6.9 mmol/L or HbA1c 5.7-6.4% (39-47 mmol/mol) | 567  | 29                                                                                   | 12.7 (7.4, 18.0)    | 0.83 (0.50, 1.37) | 10     | 5.4 (1.2, 9.6)      | 0.44 (0.21, 0.95) | 21     | 8.7 (4.8, 12.6)     | 1.29 (0.65, 2.55) |
| FG ≥7.0 mmol/L, HbA1c ≥6.5%                          | 469  | 87                                                                                   | 25.7 (18.4, 33.0)   | 3.00 (2.00, 4.50) | 54     | 15.6 (9.2, 24.0)    | 2.90 (1.73, 4.80) | 41     | 11.3 (7.0, 16.6)    | 3.05 (1.65, 5.65) |

SUPPLEMENTARY DATA

|                                                            |     |        |                     |                   |        |                     |                   |        |                     |                   |
|------------------------------------------------------------|-----|--------|---------------------|-------------------|--------|---------------------|-------------------|--------|---------------------|-------------------|
| (≥48 mmol/mol), or diabetes Rx                             |     |        | 32.9)               | 4.50)             |        | 22.0)               | 4.86)             |        | 15.7)               | 5.61)             |
| Men                                                        |     |        |                     |                   |        |                     |                   |        |                     |                   |
| FG and HbA1c Category                                      | N   | ASCVD  |                     |                   | CHD    |                     |                   | Stroke |                     |                   |
|                                                            |     | Events | Absolute Risk (95%) | RR* (95%)         | Events | Absolute Risk (95%) | RR* (95%)         | Events | Absolute Risk (95%) | RR* (95%)         |
| FG <5.6 mmol/L and HbA1c <5.7% (<39 mmol/mol)              | 288 | 27     | 15.6 (9.2, 22.1)    | Reference         | 13     | 10.4 (4.5, 16.2)    | Reference         | 15     | 5.9 (2.6, 9.2)      | Reference         |
| FG 5.6-6.9 mmol/L or HbA1c 5.7-6.4% (39-47 mmol/mol)       | 466 | 40     | 20.2 (13.1, 27.2)   | 0.92 (0.57, 1.46) | 24     | 12.0 (6.5, 17.5)    | 1.14 (0.59, 2.20) | 21     | 10.6 (5.3, 15.8)    | 0.87 (0.45, 1.65) |
| FG ≥7.0 mmol/L, HbA1c ≥6.5% (≥48 mmol/mol), or diabetes Rx | 292 | 84     | 42.7 (32.3, 53.1)   | 3.07 (2.05, 4.59) | 57     | 25.6 (18.8, 32.4)   | 4.32 (2.42, 7.72) | 36     | 21.4 (12.2, 30.6)   | 2.37 (1.33, 4.23) |

\*RR: relative risk (95% confidence interval)

†Absolute risk estimates can account for competing risk of death but cannot adjust for covariates

SUPPLEMENTARY DATA

**Supplementary Table 5.** Long-term risk for incident atherosclerotic cardiovascular disease (including fatal and non-fatal coronary heart disease and stroke, and adjusted for competing risk of death) according to fasting glucose category starting at index age 75

|                                                      |      | <b>25-Year Risk for Atherosclerotic Cardiovascular Disease, Probability (95% CI)</b> |                     |                   |        |                     |                   |        |                     |                   |
|------------------------------------------------------|------|--------------------------------------------------------------------------------------|---------------------|-------------------|--------|---------------------|-------------------|--------|---------------------|-------------------|
| Women                                                |      | ASCVD                                                                                |                     |                   | CHD    |                     |                   | Stroke |                     |                   |
| Fasting Glucose (FG) Category                        | N    | Events                                                                               | Absolute Risk (95%) | RR* (95%)         | Events | Absolute Risk (95%) | RR* (95%)         | Events | Absolute Risk (95%) | RR* (95%)         |
| FG <5.0 mmol/L                                       | 1218 | 237                                                                                  | 26.6 (23.4, 29.9)   | Reference         | 134    | 18.7 (15.2, 22.3)   | Reference         | 129    | 17.2 (13.8, 20.6)   | Reference         |
| FG 5.0-5.5 mmol/L                                    | 1667 | 390                                                                                  | 29.7 (26.9, 32.4)   | 1.20 (1.04, 1.39) | 232    | 23.9 (20.7, 27.1)   | 1.27 (1.04, 1.54) | 210    | 20.0 (17.1, 22.8)   | 1.19 (0.97, 1.46) |
| FG 5.6-6.2 mmol/L                                    | 1070 | 286                                                                                  | 32.2 (28.8, 35.5)   | 1.37 (1.18, 1.60) | 171    | 25.1 (21.3, 28.8)   | 1.45 (1.18, 1.79) | 151    | 19.7 (16.6, 22.8)   | 1.33 (1.07, 1.66) |
| FG 6.3-6.9 mmol/L                                    | 311  | 101                                                                                  | 37.2 (31.0, 43.4)   | 1.67 (1.37, 2.03) | 58     | 24.1 (18.3, 29.9)   | 1.70 (1.28, 2.25) | 53     | 21.7 (16.2, 27.1)   | 1.61 (1.20, 2.16) |
| FG ≥7.0 mmol/L or diabetes medications (Rx)          | 638  | 184                                                                                  | 40.3 (35.3, 45.4)   | 1.48 (1.25, 1.75) | 123    | 32.8 (26.2, 39.3)   | 1.75 (1.40, 2.2)  | 89     | 20.5 (16.3, 24.7)   | 1.32 (1.02, 1.70) |
| Men                                                  |      | ASCVD                                                                                |                     |                   | CHD    |                     |                   | Stroke |                     |                   |
| Fasting Glucose (FG) Category                        | N    | Events                                                                               | Absolute Risk (95%) | RR* (95%)         | Events | Absolute Risk (95%) | RR* (95%)         | Events | Absolute Risk (95%) | RR* (95%)         |
| FG <5.0 mmol/L                                       | 615  | 146                                                                                  | 33.9 (28.7, 39.1)   | Reference         | 102    | 26.8 (20.8, 32.7)   | Reference         | 52     | 17.0 (11.3, 22.8)   | Reference         |
| FG 5.0-5.5 mmol/L                                    | 1194 | 316                                                                                  | 32.7 (29.4, 36.1)   | 1.11 (0.94, 1.32) | 222    | 26.0 (22.7, 29.3)   | 1.12 (0.91, 1.39) | 127    | 15.6 (12.7, 18.5)   | 1.26 (0.92, 1.71) |
| FG 5.6-6.2 mmol/L                                    | 1032 | 296                                                                                  | 35.8 (32.0, 39.7)   | 1.21 (1.02, 1.43) | 223    | 34.3 (30.0, 38.6)   | 1.30 (1.05, 1.61) | 105    | 14.8 (11.9, 17.7)   | 1.20 (0.88, 1.65) |
| FG 6.3-6.9 mmol/L                                    | 324  | 96                                                                                   | 39.6 (32.6, 46.5)   | 1.25 (1.00, 1.55) | 67     | 30.1 (23.4, 36.8)   | 1.25 (0.94, 1.65) | 37     | 16.3 (11.2, 21.3)   | 1.35 (0.91, 2.01) |
| FG ≥7.0 mmol/L or diabetes medications (Rx)          | 600  | 223                                                                                  | 47.9 (41.9, 53.9)   | 1.57 (1.31, 1.87) | 164    | 38.6 (33.1, 44.2)   | 1.65 (1.32, 2.05) | 96     | 22.9 (18.2, 27.6)   | 1.89 (1.38, 2.60) |
| Subsample with concurrent FG and HbA1c               |      | <b>15-Year Risk for Atherosclerotic Cardiovascular Disease, Probability (95% CI)</b> |                     |                   |        |                     |                   |        |                     |                   |
| Women                                                |      | ASCVD                                                                                |                     |                   | CHD    |                     |                   | Stroke |                     |                   |
| FG and HbA1c Category                                | N    | Events                                                                               | Absolute Risk (95%) | RR* (95%)         | Events | Absolute Risk (95%) | RR* (95%)         | Events | Absolute Risk (95%) | RR* (95%)         |
| FG <5.6 mmol/L and HbA1c <5.7% (<39 mmol/mol)        | 187  | 23                                                                                   | 14.1 (7.6, 20.5)    | Reference         | 10     | 7.8 (2.9, 12.7)     | Reference         | 16     | 9.0 (3.5, 14.5)     | Reference         |
| FG 5.6-6.9 mmol/L or HbA1c 5.7-6.4% (39-47 mmol/mol) | 233  | 24                                                                                   | 15.9 (9.6, 22.2)    | 0.84 (0.49, 1.44) | 10     | 6.4 (2.4, 10.5)     | 0.80 (0.34, 1.89) | 16     | 11.0 (5.5, 16.6)    | 0.80 (0.41, 1.56) |
| FG ≥7.0 mmol/L, HbA1c ≥6.5%                          | 1492 | 527                                                                                  | 25.2 (22.8, 27.6)   | 2.87 (1.95, 4.23) | 318    | 20.1 (17.9, 22.3)   | 3.99 (2.16, 7.34) | 271    | 14.2 (12.2, 16.2)   | 2.12 (1.31, 3.43) |



SUPPLEMENTARY DATA

|                                                            |     |        |                     |                   |        |                     |                   |        |                     |                   |
|------------------------------------------------------------|-----|--------|---------------------|-------------------|--------|---------------------|-------------------|--------|---------------------|-------------------|
| (≥48 mmol/mol), or diabetes Rx                             |     |        | 27.6)               | 4.24)             |        | 22.3)               | 7.34)             |        | 16.1)               | 3.43)             |
| Men                                                        |     |        |                     |                   |        |                     |                   |        |                     |                   |
| FG and HbA1c Category                                      | N   | ASCVD  |                     |                   | CHD    |                     |                   | Stroke |                     |                   |
|                                                            |     | Events | Absolute Risk (95%) | RR* (95%)         | Events | Absolute Risk (95%) | RR* (95%)         | Events | Absolute Risk (95%) | RR* (95%)         |
| FG <5.6 mmol/L and HbA1c <5.7% (<39 mmol/mol)              | 108 | 19     | 28.3 (14.4, 42.2)   | Reference         | 9      | 10.9 (4.2, 17.7)    | Reference         | 12     | 20.3 (7.2, 33.4)    | Reference         |
| FG 5.6-6.9 mmol/L or HbA1c 5.7-6.4% (39-47 mmol/mol)       | 205 | 24     | 19.4 (10.7, 28.2)   | 0.67 (0.38, 1.16) | 14     | 12.2 (4.9, 19.5)    | 0.82 (0.37, 1.83) | 11     | 8.1 (2.6, 13.7)     | 0.48 (0.22, 1.06) |
| FG ≥7.0 mmol/L, HbA1c ≥6.5% (≥48 mmol/mol), or diabetes Rx | 955 | 398    | 36.6 (32.7, 40.6)   | 2.37 (1.56, 3.59) | 298    | 32.9 (29.3, 36.5)   | 3.74 (1.99, 7.05) | 146    | 13.5 (10.8, 16.2)   | 1.38 (0.79, 2.39) |

\*RR: relative risk (95% confidence interval)

†Absolute risk estimates can account for competing risk of death but cannot adjust for covariates

SUPPLEMENTARY DATA

**Supplementary Table 6.** Long-term risk for incident cardiovascular disease (including fatal and non-fatal coronary heart disease and stroke) according to fasting glucose category at index age 55 when stratifying by the presence of other cardiovascular risk factors

| <b>30-Year Risk for Cardiovascular Disease, Probability (95% CI)</b> |                |        |                     |           |                   |        |                     |                   |                               |        |                     |                   |
|----------------------------------------------------------------------|----------------|--------|---------------------|-----------|-------------------|--------|---------------------|-------------------|-------------------------------|--------|---------------------|-------------------|
| Fasting Glucose (FG) Category                                        |                |        |                     |           |                   |        |                     |                   |                               |        |                     |                   |
| Women                                                                | FG <5.6 mmol/L |        |                     |           | FG 5.6-6.9 mmol/L |        |                     |                   | FG ≥7.0 mmol/L or diabetes Rx |        |                     |                   |
| Stratum of CVD Risk Factors                                          | N              | Events | Absolute Risk (95%) | RR* (95%) | N                 | Events | Absolute Risk (95%) | RR* (95%)         | N                             | Events | Absolute Risk (95%) | RR* (95%)         |
| 0 Risk factors                                                       | 1924           | 58     | 11.6 (7.1, 16.1)    | Reference | 406               | 18     | 10.0 (3.7, 16.2)    | 1.47 (0.88, 2.47) | 41                            | 3      | 13.8 (0.0, 30.0)    | 2.43 (0.79, 7.43) |
| 1 Risk Factors                                                       | 2456           | 142    | 14.6 (11.3, 17.9)   | Reference | 845               | 57     | 11.1 (8.0, 14.3)    | 1.17 (0.87, 1.57) | 175                           | 35     | 30.4 (21.0, 39.8)   | 3.46 (2.47, 4.84) |
| 2 Risk Factors                                                       | 1773           | 160    | 17.1 (13.9, 20.2)   | Reference | 1008              | 108    | 18.7 (14.6, 22.8)   | 1.19 (0.94, 1.50) | 436                           | 96     | 37.1 (28.6, 45.6)   | 2.44 (1.94, 3.07) |
| 3-4 Risk Factors                                                     | 646            | 88     | 28.0 (21.6, 34.5)   | Reference | 460               | 71     | 26.9 (20.8, 33.0)   | 1.13 (0.85, 1.51) | 338                           | 91     | 49.0 (38.9, 59.1)   | 1.98 (1.52, 2.57) |
| FG Category                                                          |                |        |                     |           |                   |        |                     |                   |                               |        |                     |                   |
| Men                                                                  | FG <5.6 mmol/L |        |                     |           | FG 5.6-6.9 mmol/L |        |                     |                   | FG ≥7.0 mmol/L or diabetes Rx |        |                     |                   |
| Stratum of CVD Risk Factors                                          | N              | Events | Absolute Risk (95%) | RR* (95%) | N                 | Events | Absolute Risk (95%) | RR* (95%)         | N                             | Events | Absolute Risk (95%) | RR* (95%)         |
| 0 Risk factors                                                       | 1092           | 64     | 11.7 (8.3, 15.1)    | Reference | 606               | 63     | 19.4 (13.3, 25.5)   | 1.77 (1.27, 2.48) | 63                            | 15     | 35.2 (17.0, 53.4)   | 4.06 (2.46, 6.71) |
| 1 Risk Factors                                                       | 1681           | 177    | 20.3 (16.9, 23.6)   | Reference | 1172              | 141    | 19.3 (15.8, 22.8)   | 1.14 (0.93, 1.41) | 225                           | 71     | 45.6 (36.4, 54.7)   | 3.00 (2.36, 3.80) |
| 2 Risk Factors                                                       | 1138           | 198    | 29.5 (25.3, 33.6)   | Reference | 994               | 192    | 29.3 (25.1, 33.6)   | 1.11 (0.93, 1.33) | 348                           | 110    | 45.1 (38.0, 52.1)   | 1.82 (1.49, 2.22) |
| 3-4 Risk Factors                                                     | 349            | 74     | 37.9 (28.5, 47.3)   | Reference | 400               | 96     | 42.7 (33.7, 51.7)   | 1.13 (0.87, 1.48) | 217                           | 64     | 62.7 (51.5, 73.9)   | 1.39 (1.04, 1.86) |

\*RR: relative risk (95% confidence interval)

†Absolute risk estimates can account for competing risk of death but cannot adjust for covariates

§Risk factors were summed as the aggregate of hypertension, obesity, current smoking, and high cholesterol (range 0-4). Hypertension defined as systolic blood pressure/diastolic blood pressure: 140/90 mm Hg or use of blood pressure lowering medications. Obesity defined as body mass index ≥ 30 kg/m<sup>2</sup>. Current smoking defined as self-report of being a current smoker. High cholesterol defined as total cholesterol ≥ 6.2 mmol/L or use of cholesterol lowering medications.

SUPPLEMENTARY DATA

**Supplementary Table 7.** Long-term risk for incident cardiovascular disease (including fatal and non-fatal coronary heart disease and stroke, and adjusted for competing risk of death) according to fasting glucose category at index age 55, when excluding each individual cohort

| <b>30-Year Risk for Cardiovascular Disease, Probability (95% CI)</b> |                   |                   |                                           |
|----------------------------------------------------------------------|-------------------|-------------------|-------------------------------------------|
| Fasting Glucose (FG) Category                                        |                   |                   |                                           |
| Women                                                                | FG <5.6 mmol/L    | FG 5.6-6.9 mmol/L | FG ≥7.0 mmol/L or diabetes medication use |
| Excluding ARIC                                                       | 16.0 (12.2, 19.8) | 18.9 (10.2, 27.6) | 42.2 (29.3, 55.1)                         |
| Excluding CARDIA                                                     | 17.3 (15.1, 19.6) | 16.6 (14.2, 18.9) | 38.7 (33.3, 44.0)                         |
| Excluding FOS                                                        | 15.6 (13.4, 17.7) | 16.1 (13.7, 18.5) | 38.1 (32.8, 43.4)                         |
| Excluding JHS                                                        | 15.7 (13.7, 17.6) | 16.4 (14.0, 18.7) | 38.9 (33.6, 44.1)                         |
| Excluding MESA                                                       | 15.7 (13.8, 17.7) | 16.5 (14.2, 18.8) | 39.5 (34.0, 44.9)                         |
|                                                                      |                   |                   |                                           |
| Men                                                                  | FG <5.6 mmol/L    | FG 5.6-6.9 mmol/L | FG ≥7.0 mmol/L or diabetes medication use |
| Excluding ARIC                                                       | 22.5 (18.4, 26.7) | 26.9 (18.7, 35.1) | 53.2 (40.1, 66.2)                         |
| Excluding CARDIA                                                     | 22.2 (20.1, 24.4) | 25.5 (23.0, 27.9) | 48.3 (43.4, 53.3)                         |
| Excluding FOS                                                        | 21.9 (19.5, 24.3) | 24.6 (22.0, 27.2) | 47.0 (41.8, 52.2)                         |
| Excluding JHS                                                        | 22.6 (20.4, 24.7) | 25.1 (22.7, 27.6) | 47.7 (42.7, 52.7)                         |
| Excluding MESA                                                       | 22.8 (20.6, 25.0) | 25.3 (22.8, 27.7) | 48.6 (43.6, 53.6)                         |

\*Abbreviations: ARIC, Atherosclerosis Risk in Communities Study; CARDIA, Coronary Artery Risk Development in Young Adults; FOS, Framingham Offspring Study; JHS, Jackson Heart Study; MESA, Multi-Ethnic Study of Atherosclerosis

†Absolute risk estimates can account for competing risk of death but cannot adjust for covariates

§Each row includes 4 of the 5 cohorts; ARIC, CARDIA, FOS, JHS, and MESA. The Cardiovascular Health Study and Framingham Heart Study were excluded from this sensitivity analysis due to all participants from each cohort having age greater than 55 years at the time of glucose status.
